# Supplementary material for: RS Content and eGI Value of Cooked Noodles (I): Effect of Cooking Methods
Source: MDPI journal article supplement (doi:10.3390/foods9030328), 2020-03-11
Supplement: s1 [file s1]

**Table S1.** Effect of different boiling time on the RS content

| Boiling Time/min | RS content(g/100g) |
|------------------|--------------------|
| 2                | 0.60±0.01a         |
| 2.5              | 0.49±0.01b         |
| 3                | 0.44±0.01c         |
| 3.5              | 0.43±0.01c         |
| 4                | 0.41±0.01c         |

**Table S2.** Effect of different steaming time on RS content

| Steaming time/min | RS content(g/100g) |
|-------------------|--------------------|
| 10                | 0.79±0.01a         |
| 15                | 0.44±0.00b         |
| 20                | 0.39±0.03c         |
| 30                | 0.38±0.02c         |

**Table S3.** Effect of microwave time on RS content

| Microwave heating time (min) | RS content(g/100g) |
|------------------------------|--------------------|
| 60s                          | 1.36±0.12a         |
| 120s                         | 1.0±0.04b          |
| 150s                         | 0.99±0.03b         |
| 180s                         | 1.01±0.03b         |
| 240s                         | 0.95±0.03b         |

**Table S4.** Effect of adding oil and stir-frying time on RS content

| Stir-frying conditions (oil, time) | RS content(g/100g) |
|------------------------------------|--------------------|
| 5 mL 30s                           | 0.52±0.01d         |
| 5 mL 120s                          | 0.90±0.01a         |
| 10 mL 30s                          | 0.59±0.01c         |
| 10 mL 120s                         | 0.76±0.01b         |
| 15 mL 30s                          | 0.61±0.01c         |
| 15 mL 120s                         | 0.20±0.01e         |

**Table S5.** Effect of oil temperature and frying time on RS content

| Frying conditions (temperature, time) | RS content(g/100g) |
|---------------------------------------|--------------------|
| 140°C 30s                             | 0.47±0.02a         |
| 140°C 120s                            | 0.25±0.00b         |
| 160°C 30s                             | 0c                 |
| 160°C 120s                            | 0c                 |
| 180°C 30s                             | 0c                 |
| 180°C 120s                            | 0c                 |
| 200°C 30s                             | 0c                 |
| 200°C 120s                            | 0c                 |
